# Supplementary material for: S-217622, a SARS-CoV-2 main protease inhibitor, decreases viral load and ameliorates COVID-19 severity in hamsters
Source: PubMed Central journal article supplement (PMC9765455; doi:10.1126/scitranslmed.abq4064), 2022-11-03
Supplement: scitranslmed.abq4064_sm.pdf [file scitranslmed.abq4064_sm.pdf]

Supplementary Materials for  
**S-217622, a SARS-CoV-2 main protease inhibitor, decreases viral load and  
ameliorates COVID-19 severity in hamsters**

Michihito Sasaki *et al.*

Corresponding author: Michihito Sasaki, m-sasaki@czc.hokudai.ac.jp; Hirofumi Sawa, h-sawa@czc.hokudai.ac.jp

*Sci. Transl. Med.* **0**, eabq4064 (2022)  
DOI: 10.1126/scitranslmed.abq4064

**The PDF file includes:**

Materials and Methods  
Figs. S1 to S7  
Table S1

**Other Supplementary Material for this manuscript includes the following:**

Movies S1 to S3  
Data file S1  
MDAR Reproducibility Checklist

## **Supplementary Materials and Methods**

### **Compound cytotoxicity assay**

Cells were treated with S-217622 serially diluted in 2-fold increments by culture medium containing 2% fetal bovine serum (FBS). After a 3 day culture, cell toxicity was evaluated by measurement of ATP in live cells with CellTiter-Glo 2.0 reagent (Promega) or lactate dehydrogenase (LDH) released from dead cells in the basal medium with LDH-Glo Cytotoxicity Assay kit (Promega). Luminescence was detected on a luminometer (GloMax-Multi detection system, Promega).

### **Biosensor assay for viral protease activity**

The DNA fragments encoding NSP3 or NSP4, NSP5, N-terminal NSP6 (NSP4/5/6N) of SARS-CoV-2 WK-521 strain (lineage A) were cloned into pCMV-derivative pCXS vector to generate pSARS-CoV-2 papain-like protease (PL<sup>pro</sup>) and pSARS-CoV-2 main protease (M<sup>pro</sup>), respectively. The amino acid sequence AVLQS (for the cleavage by M<sup>pro</sup>) or RLKGG (for the cleavage by PL<sup>pro</sup>) were replaced into pGloSensor-30F vector backbone (CS182101, Promega) to generate firefly luciferase-based biosensor expressing plasmid pGS-AVLQS or pGS-RLKGG, respectively. 293T cells on 96-well plate were co-transfected with a set of pGS-AVLQS and pSARS-CoV-2 M<sup>pro</sup> or a set of pGS-RLKGG and pSARS-CoV-2 PL<sup>pro</sup> using TranIT-LT1 (Mirus Bio) in the presence of serial diluted S-217622. At 24 hours post-transfection, the luminescence signals of biosensors and renilla luciferase (an internal control reporter) from pGS vectors were measured by Dual-Glo Luciferase Assay System (Promega). The ratio (firefly luciferase:renilla luciferase) was calculated to normalize for the influence of transfection efficiency. Non-treated cells were used as a control for 100% biosensor activation.

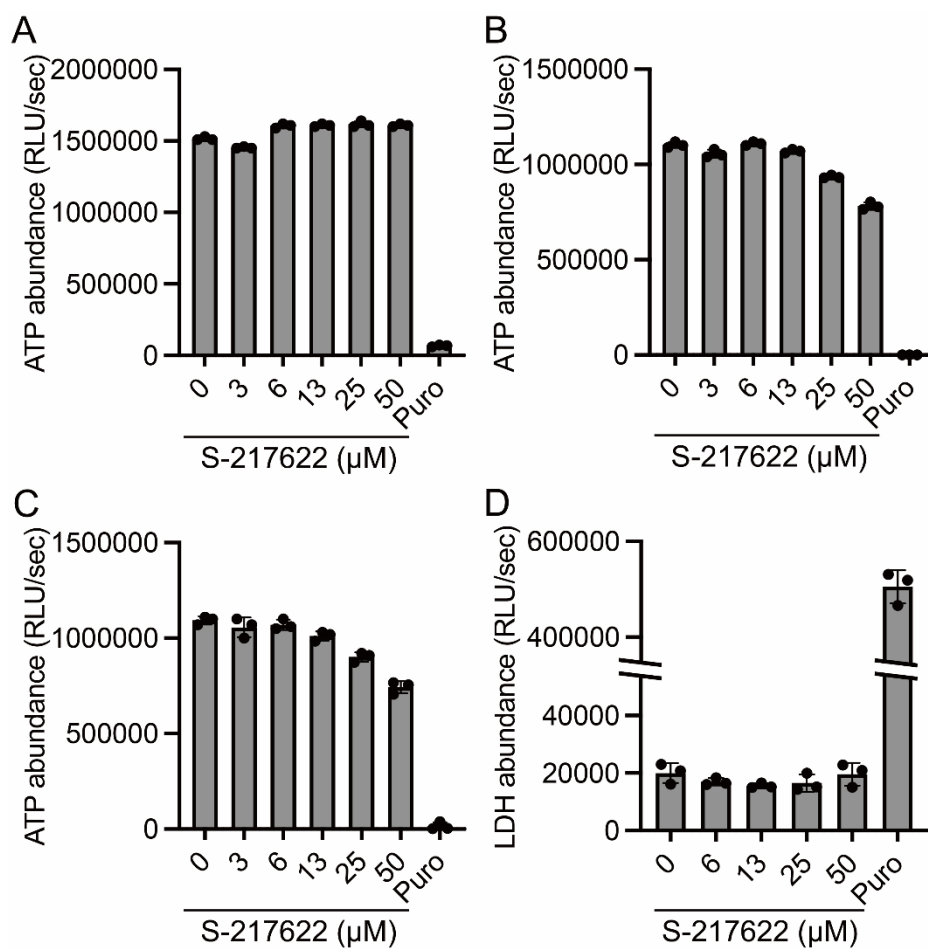

**Fig. S1. Cytotoxicity of S-217622.**

(A to D) Calu-3 cells (A), Vero-TMPRSS2 cells (B), Vero-TMPRSS2 cells with CP-100356 at 1  $\mu\text{M}$  (C), and primary human bronchial epithelial cells (D) were treated with S-217622 for 3 days. Cell toxicity was evaluated by measurement of ATP in live cells (A to C) or LDH released from dead cells in the basal medium (D). Puromycin (puro) was used as a control compound to mediate cell toxicity. The values shown are mean  $\pm$  SD of triplicate samples. RLU, relative light units.

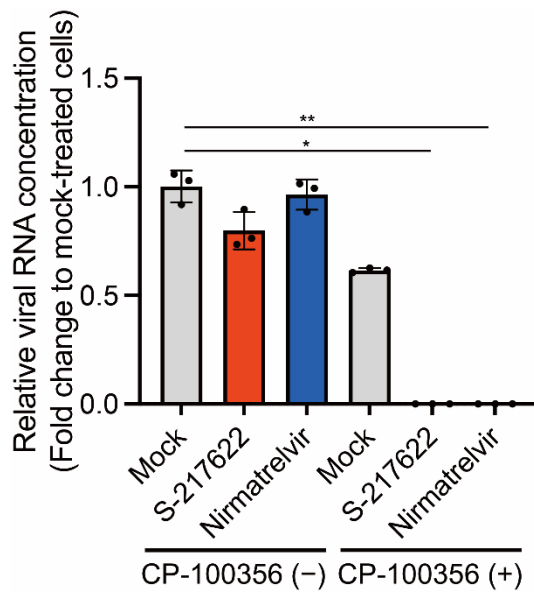

**Fig. S2. Antiviral activity of SARS-CoV-2 main protease inhibitors in the presence of a P-glycoprotein (P-gp) inhibitor.**

Vero-TMPRSS2 cells were infected with SARS-CoV-2 Delta variant at a multiplicity of infection (MOI) of 0.01 and treated with S-217622 at 100 nM or nirmatrelvir at 300 nM for 24 hours in the absence or presence of the P-gp inhibitor, CP-100356 at 1  $\mu$ M. The inhibitory effect of each treatment was evaluated by measurement of intracellular viral RNA concentration at 24 hours post infection (hpi). The values shown are mean  $\pm$  SD of triplicate samples. \* $p$ <0.05, \*\* $p$ <0.01 by Kruskal-Wallis test with Dunn's test.

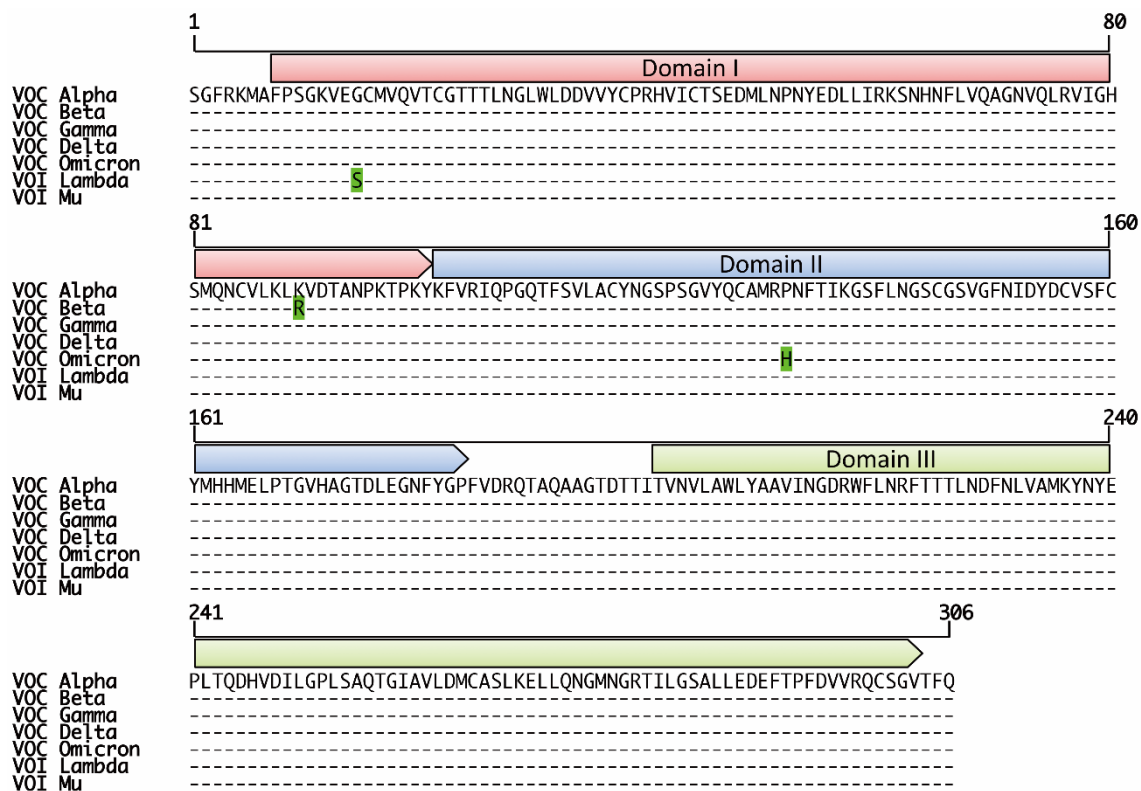

**Fig. S3. Multiple amino acid sequence alignments of M<sup>pro</sup> from SARS-CoV-2 variants of concern (VOCs) and variants of interest (VOIs).**

Multiple sequence alignment based on the entire length of M<sup>pro</sup> from the VOCs Alpha (lineage B.1.1.7, GISAID: EPI\_ISL\_768526), Beta (lineage B.1.351, GISAID: EPI\_ISL\_1123289), Gamma (lineage P.1, GISAID: EPI\_ISL\_877769), Delta (lineage B.1.617.2, GISAID: EPI\_ISL\_2158617), and Omicron (lineage BA.2.75, GISAID: EPI\_ISL\_14011362), as well as the VOIs Lambda (lineage C.37, GISAID: EPI\_ISL\_4204973), and Mu (lineage B.1.612, GISAID: EPI\_ISL\_4470503). Dashes (-) represent amino acids identical to M<sup>pro</sup> of Alpha. Amino acids different from the consensus are colored in green.

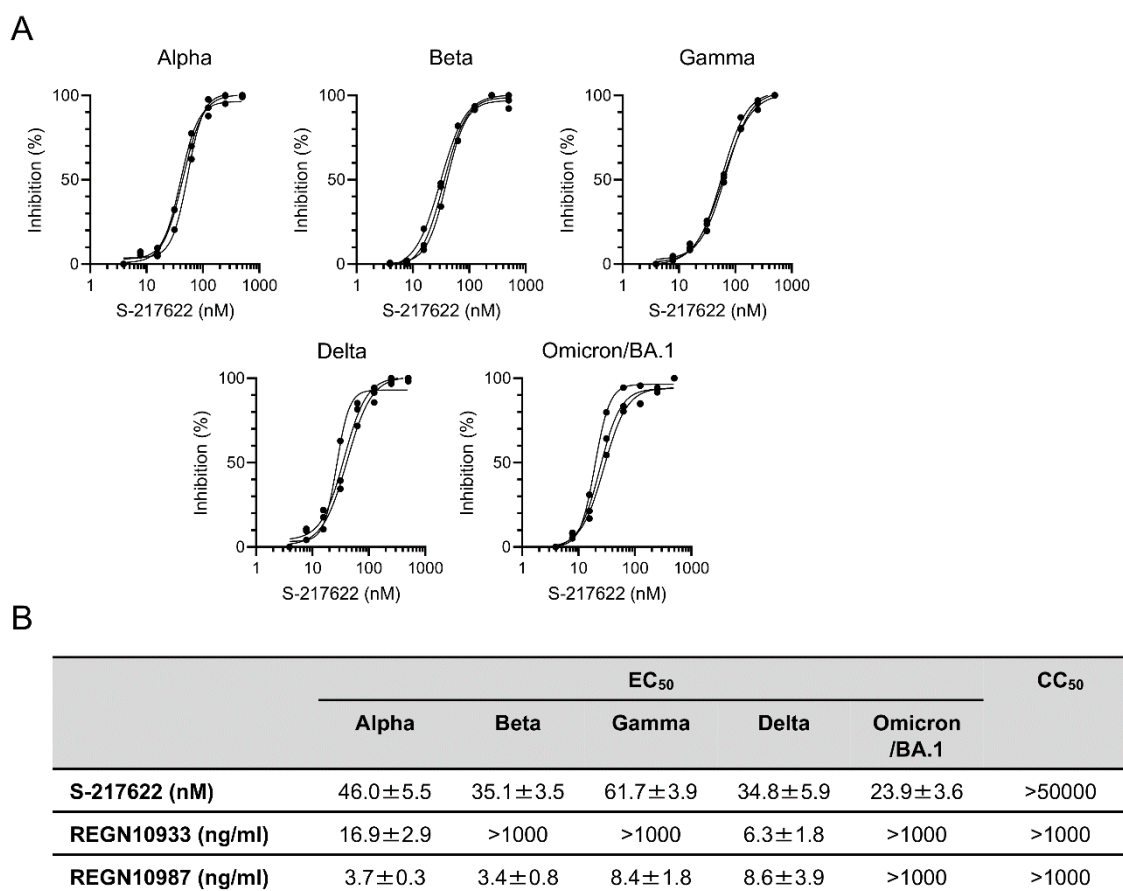

**Fig. S4. Antiviral potency of S-217622 against SARS-CoV-2 VOCs.**

Cytopathic effect (CPE) in 293T-hACE2-TMPRSS2 cells induced by SARS-CoV-2 infection was measured at 3 dpi by 3-[4,5-dimethyl-2-thiazolyl]-2,5-diphenyl-2H-tetrazolium bromide (MTT) assay. **(A)** The inhibitory effect of S-217622 on SARS-CoV-2 VOCs was examined. Uninfected cells were used as a control for 100% inhibition. **(B)** The 50% effective concentration (EC<sub>50</sub>) and cytotoxic concentration (CC<sub>50</sub>) of S-217622 and anti-SARS-CoV-2 neutralizing monoclonal antibodies (REGN10933 and REGN10987) are shown.

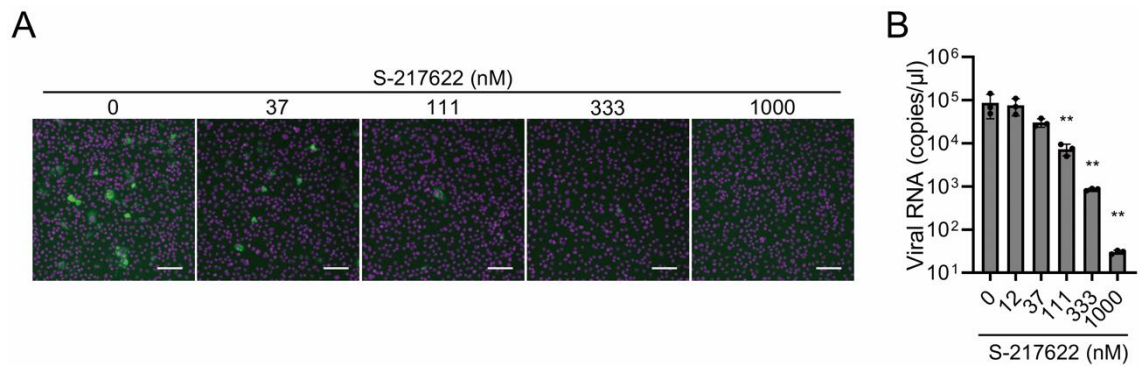

**Fig. S5. Susceptibility of the SARS-CoV-2 Omicron variant to treatment with S-217622.**

(A) Immunofluorescence staining is shown of Vero-TMPRSS2 cells infected with the SARS-CoV-2 Omicron variant BA.1. Cells were inoculated with the SARS-CoV-2 Omicron variant at an MOI of 0.1 and then cultured in the presence of S-217622 for 24 hours. Cells were stained with anti-SARS-CoV-2 nucleocapsid antibody (green) and Hoechst 33342 (magenta). Scale bars, 100 μm. (B) Viral RNA concentrations were measured in the culture supernatant of Vero-TMPRSS2 at 24 hpi with the SARS-CoV-2 Omicron variant at an MOI of 0.01. The values shown are mean ± SD of triplicate samples. \*\* $p < 0.01$  by one-way ANOVA with Dunnett's test.

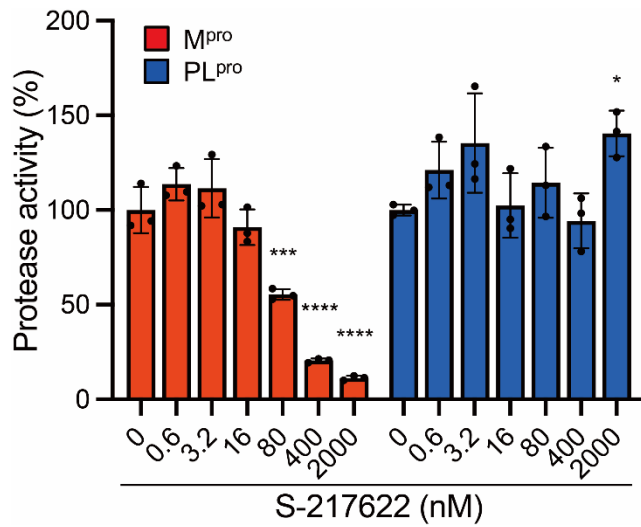

**Fig. S6. Luciferase-based biosensor assay for SARS-CoV-2 protease activity.**

293T cells were co-transfected with expression plasmids of SARS-CoV-2 M<sup>pro</sup> and a biosensor for SARS-CoV-2 M<sup>pro</sup> and maintained in the presence of S-217622. The luminescence signal from the biosensor was measured as the protease activity at 24 hours post transfection. 293T cells expressing SARS-CoV-2 PL<sup>pro</sup> and another biosensor for PL<sup>pro</sup> were used as a control for the target specificity of S-217622. The values shown are mean  $\pm$  SD of triplicate samples. \*p<0.05, \*\*\*p<0.001, \*\*\*\*p<0.0001 by one-way ANOVA with Dunnett's test.



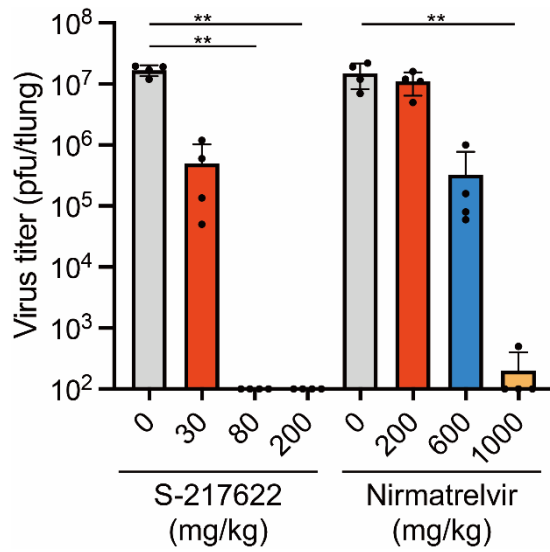

**Fig. S7. In vivo antiviral efficacy of SARS-CoV-2 main protease inhibitors.**

Hamsters were intranasally inoculated with 5,000 plaque-forming units (pfu) of the SARS-CoV-2 Delta variant. The hamsters were treated with oral administration of S-217622 or nirmatrelvir twice daily (b.i.d.) from the time of infection (0 hpi) for prophylactic treatment (n=4 for each treatment). Virus titers in lungs from hamsters at 4 dpi were determined by plaque assay. The values shown are mean ± SD. \*\*p<0.01 by Kruskal-Wallis test with Dunn's test.

**Table S1. Pharmacokinetic parameters of S-217622 in plasma after a single oral administration of S-217622 in hamsters.**

|                                          | S-217622 in plasma |           |           |
|------------------------------------------|--------------------|-----------|-----------|
|                                          | 10 mg/kg           | 30 mg/kg  | 100 mg/kg |
| <b>C<sub>max</sub> (μM)</b>              | 12.7±2.2           | 61.6±18.7 | 254±24    |
| <b>T<sub>max</sub> (h)</b>               | 0.5±0.0            | 1.17±0.76 | 2.67±1.15 |
| <b>t<sub>1/2,z</sub> (h)<sup>a</sup></b> | 4.46±1.03          | 3.96±0.74 | 3.43±0.13 |
| <b>AUC<sub>0-28h</sub> (μM·h)</b>        | 78.3±11.0          | 415±52    | 2480±350  |
| <b>AUC<sub>0-inf</sub> (μM·h)</b>        | 79.3±10.5          | 417±51    | 2500±350  |

a: t<sub>1/2</sub>, 8-28hr

C<sub>max</sub>, maximum concentration; T<sub>max</sub>, time to peak drug concentration; t<sub>1/2</sub>, half-life; AUC, area under the curve.

**Movie S1. Reconstructed 3D image of viral antigen distribution in the lung of a vehicle-treated hamster at 4 dpi.** The hamster was inoculated with SARS-CoV-2 Delta variant and treated with 0.5% methyl cellulose solution (vehicle for S-217622) from 1 dpi to 3 dpi. Related to Fig. 5E.

**Movie S2. Reconstructed 3D image of viral antigen distribution in the lung of a S-217622-treated hamster at 4 dpi.** The hamster was inoculated with SARS-CoV-2 Delta variant and treated with S-217622 (200 mg/kg) from 1 dpi to 3 dpi. Related to Fig. 5F.

**Movie S3. Reconstructed 3D image of viral antigen distribution in the lung of a MPV-treated hamster at 4 dpi.** The hamster was inoculated with SARS-CoV-2 Delta variant and treated with MPV (200 mg/kg) from 1 dpi to 3 dpi. Related to Fig. 5G.

**Data file S1.** Raw, individual-level data for all experiments.
